# Supplementary material for: Synthesis and characterization of an immobilized thiosalicylic–mercaptoethanol biligand system and its application in the detoxification of chromium( iii ) and iron( iii ) ions from tannery wastewater
Source: Royal Society of Chemistry journal article supplement (doi:10.1039/c9nj05072h), 2020-01-01
Supplement: c9nj05072h1.pdf [file c9nj05072h1.pdf]

1 **Supplementary Table 1:** Effect of pH on the Adsorption of Metals in Tannery  
 2 Wastewater

| <b>Cr</b>                   | <b>pH 2</b> | <b>pH 4</b> | <b>pH 6</b> | <b>pH 7</b> | <b>pH 9</b> |
|-----------------------------|-------------|-------------|-------------|-------------|-------------|
| Initial concentration (ppm) | 10.952      | 10.952      | 10.952      | 10.952      | 10.952      |
| Final concentration (ppm)   | 4.748       | 7.535       | 10.647      | 10.220      | 6.639       |
| Percentage adsorption (%)   | 43.356      | 68.803      | 97.224      | 93.320      | 60.628      |
| <b>Fe</b>                   | <b>pH 2</b> | <b>pH 4</b> | <b>pH 6</b> | <b>pH 7</b> | <b>pH 9</b> |
| Initial concentration (ppm) | 0.328       | 0.328       | 0.328       | 0.328       | 0.328       |
| Final concentration (ppm)   | 0.002       | 0.280       | 0.328       | 0.272       | 0.246       |
| Percentage adsorption (%)   | 0.882       | 85.547      | 100.000     | 83.000      | 75.000      |

3

4
